# Supplementary material for: The Effect of Prohibitins on Mitochondrial Function during Octopus tankahkeei Spermiogenesis
Source: MDPI journal article supplement (doi:10.3390/ijms241210030), 2023-06-12
Supplement: s1 [file s1]

**Supplementary Table S1.** PHB1 homologous proteins genebank accession numbers

| Species                       | Order/Phylum                | Accession numbers | Protein identity |
|-------------------------------|-----------------------------|-------------------|------------------|
| <i>Homo sapiens</i>           | Mammalia/Vertebrata         | AAB21614.1        | 73.3%            |
| <i>Bos taurus</i>             | Mammalia/Vertebrata         | NP_001029744.1    | 73.3%            |
| <i>Mus musculus</i>           | Mammalia/Vertebrata         | NP_032857.1       | 73.6%            |
| <i>Gallus gallus</i>          | Aves/Vertebrata             | NP_001171206.1    | 74%              |
| <i>Anas platyrhynchos</i>     | Aves/Vertebrata             | XP_005026195.1    | 73.6%            |
| <i>Manacus vitellinus</i>     | Aves/Vertebrata             | XP_017943376.1    | 74%              |
| <i>Pseudonaja textilis</i>    | Reptile/Vertebrata          | XP_026566590.1    | 73.6%            |
| <i>Python bivittatus</i>      | Reptile/Vertebrata          | XP_007428971.1    | 74%              |
| <i>Cynops orientalis</i>      | Amphibia/Vertebrata         | AJF36071.1        | 74.7%            |
| <i>Xenopus tropicalis</i>     | Amphibia/Vertebrata         | NP_001079486.1    | 72.9%            |
| <i>Danio rerio</i>            | Pisces/Vertebrata           | NP_958454.1       | 74.0%            |
| <i>Salmo salar</i>            | Pisces/Vertebrata           | NP_001133602.1    | 73.6%            |
| <i>Larimichthys crocea</i>    | Pisces/Vertebrata           | MG712297          | 74.4%            |
| <i>Procambarus clarkii</i>    | Malacostraca/Arthropoda     | AGU02225.1        | 66.3%            |
| <i>Eriocheir sinensis</i>     | Crustacea/Arthropoda        | ADM64319.1        | 66.3%            |
| <i>Octopus tankahkei</i>      | Cephalopoda /Mollusca       | AEI91930.1        | -                |
| <i>Octopus bimaculoides</i>   | Cephalopoda /Mollusca       | KOF98822.1        | 95.2%            |
| <i>Phascolosoma esculenta</i> | Phascolosomatidea/Sipuncula | KY807538          | 73.6%            |
| <i>Helobdella robusta</i>     | <u>Clitellata</u> /Annelida | ESO02205.1        | 70.7%            |
| <i>Caenorhabditis elegans</i> | Secernentea/Nematoda        | NP_490929.1       | 69.6%            |
| <i>Clonorchis sinensis</i>    | Trematoda/Platyhelminthes   | AAY32923.1        | 67.9%            |
| <i>Schistosoma bovis</i>      | Trematoda/Platyhelminthes   | RTG85735.1        | 70.1%            |

**Supplementary Table S2.** PHB2 homologous proteins genebank accession numbers

| Species                        | Order/Phylum            | Accession numbers | Protein identity |
|--------------------------------|-------------------------|-------------------|------------------|
| <i>Homo sapiens</i>            | Mammalia/Vertebrata     | AAI10323.1        | 71.3%            |
| <i>Bos taurus</i>              | Mammalia/Vertebrata     | NP_001039663.1    | 71.3%            |
| <i>Mus musculus</i>            | Mammalia/Vertebrata     | NM_007531.2       | 71.3%            |
| <i>Gallus gallus</i>           | Aves/Vertebrata         | NP_001074354.1    | 69.5%            |
| <i>Trichinella nativa</i>      | Enoplea/Nematoda        | KRZ54536.1        | 69.1%            |
| <i>Trichinella papuae</i>      | Enoplea/Nematoda        | KRZ69524.1        | 68.8%            |
| <i>Pseudonaja textilis</i>     | Reptile/Vertebrata      | XP_026569140.1    | 69.2%            |
| <i>Python bivittatus</i>       | Reptile/Vertebrata      | XP_007420472.1    | 68.9%            |
| <i>Sepiella japonica</i>       | Cephalopoda/Mollusca    | APX42718.1        | 85.2%            |
| <i>Xenopus tropicalis</i>      | Amphibia/Vertebrata     | AAI57772.1        | 70.2%            |
| <i>Danio rerio</i>             | Pisces/Vertebrata       | AAH59510.1        | 65.8%            |
| <i>Salmo salar</i>             | Pisces/Vertebrata       | ACI69259.1        | 65.5%            |
| <i>Cryptotermes secundus</i>   | Hexapoda/Arthropoda     | PNF39567.1        | 76.8%            |
| <i>Trichogramma pretiosum</i>  | Hexapoda/Arthropoda     | XP_014230069.1    | 75.3%            |
| <i>Octopus bimaculoides</i>    | Cephalopoda /Mollusca   | XP_014771498.1    | 97%              |
| <i>Parus major</i>             | Euteleostomi/Vertebrata | XP_015492179.1    | 70.3%            |
| <i>Drosophila melanogaster</i> | Hexapoda/Arthropoda     | AAF57632.3        | 71.6%            |
| <i>Pseudopodoces humilis</i>   | Euteleostomi/Vertebrata | XP_005523876.1    | 70.3%            |
| <i>Thamnophis sirtalis</i>     | Euteleostomi/Vertebrata | XP_013927073.1    | 69.7%            |
| <i>Nanorana parkeri</i>        | Amphibia/Vertebrata     | XP_018408683.1    | 63.9%            |
| <i>Copidosoma floridanum</i>   | Insecta/Arthropoda      | XP_014218664.1    | 75.2%            |
